# Supplementary material for: Association Between the Use of Cannabis and Physical Violence in Youths: A Meta-Analytical Investigation
Source: Atypon-hosted journal article supplement (doi:10.1176/appi.ajp.2020.19101008), 2020-05-27
Supplement: appi.ajp.2019.19101008.ds001.pdf [file appi.ajp.2019.19101008.ds001.pdf]

## Supplementary Online Content

Dellazizzo, L., Potvin, S., Dou, BY., et al. Association Between the Use of Cannabis and Physical Violence in Youths: A Meta-Analytical Investigation

**Methods S1.** Electronic search strategy for the meta-analysis conducted as of July 2019.

**Table S1.** Details of the retrieved studies included in the meta-analysis.

**Table S2.** MOOSE Checklist.

**Figure S1.** Egger's test for publication bias.

This supplementary material has been provided by the authors to give readers additional information about their work.

## Methods S1. Electronic search strategy for the meta-analysis conducted as of July 2019.

| Database; Search              | Search terms                                                                                                                                                                                                                                                                                                                                                                                                                                                                                                                                                                                                                                                                                                                                                                                                          |
|-------------------------------|-----------------------------------------------------------------------------------------------------------------------------------------------------------------------------------------------------------------------------------------------------------------------------------------------------------------------------------------------------------------------------------------------------------------------------------------------------------------------------------------------------------------------------------------------------------------------------------------------------------------------------------------------------------------------------------------------------------------------------------------------------------------------------------------------------------------------|
| 1. PubMed;<br>k=6,607         | ((cannabis[Title/Abstract]) OR (hashish[Title/Abstract]) OR (THC[Title/Abstract]) OR (tetrahydrocannabinol[Title/Abstract]) OR (marijuana[Title/Abstract]) OR (marihuana[Title/Abstract]) OR (pot[Title/Abstract]) OR (cannabinoids[Title/Abstract]) OR (weed[Title/Abstract]) OR (cannabis abuse[MeSH Terms]) (cannabis[MeSH Terms]) OR (cannabis dependence[MeSH Terms]) OR (marijuana use[MeSH Terms]) OR (marijuana dependence[MeSH Terms]) OR (substance[Title/Abstract]) OR (marijuana abuse[MeSH Terms])) AND ((violence[Title/Abstract]) OR (violent[Title/Abstract]) OR (violence[Title/Abstract]) OR (violence[MeSH Terms]) OR (aggress*[Title/Abstract]) OR (aggression[MeSH Terms]) OR (batter*[Title/Abstract]) OR (fight*[Title/Abstract]) OR (offend*[Title/Abstract]) OR (assault*[Title/Abstract]))) |
| 2. PsycINFO;<br>k=1,194       | (title: substance OR abstract: substance OR title: cannabinoids OR abstract: cannabinoids OR title: cannabis OR abstract: cannabis OR title: hashish OR abstract: hashish OR title: marijuana OR abstract: marijuana OR title: tetrahydrocannabinol OR abstract: tetrahydrocannabinol OR title: THC OR abstract: THC OR title: marihuana OR abstract: marihuana OR title: pot OR abstract: pot OR title: weed OR abstract: weed) AND (title: violence OR title: violent OR title: aggress* OR title: batter* OR title: fight* OR title: offend* OR title: assault* OR abstract: violence OR abstract: violent OR abstract: aggress* OR abstract: batter* OR abstract: fight* OR abstract: offend* OR abstract: assault*)                                                                                              |
| 3. Web of Science;<br>k=5,873 | (TS=(substance OR cannabinoids OR cannabis OR hashish OR marijuana OR tetrahydrocannabinol OR THC OR marihuana OR pot OR weed)) AND (TS=(violence OR violent OR aggress* OR batter* OR fight* OR offend* OR assault*))                                                                                                                                                                                                                                                                                                                                                                                                                                                                                                                                                                                                |

Note. A search in Google Scholar and cross-referencing from hand searches of bibliographies of retrieved sources enabled in the finding of additional k=3 studies.

**Table S1. Details of the retrieved studies included in the meta-analysis.**

| Author, Year                              | Geographic setting | Study design based on the measures considered | Population      |        | Measures: Violence                                                                                                                 | Measure: Cannabis                                                                                       | Confounding factors                                                                                       | Quality of observational study (GRADE System) |
|-------------------------------------------|--------------------|-----------------------------------------------|-----------------|--------|------------------------------------------------------------------------------------------------------------------------------------|---------------------------------------------------------------------------------------------------------|-----------------------------------------------------------------------------------------------------------|-----------------------------------------------|
|                                           |                    |                                               | Sample analyzed | % Boys |                                                                                                                                    |                                                                                                         |                                                                                                           |                                               |
| Arseneault et al., <sup>22</sup> 2000     | New-Zealand        | Cross-sectional                               | 91              | 51.6   | Simple assault, aggravated assault, robbery, rape and gang-fighting assessed with a private standardized interview; Past 12 months | DSM-III-R Cannabis use disorder; Past 12 months                                                         | Socioeconomic status and sex                                                                              | Moderate                                      |
| Brook et al., <sup>26</sup> 2014          | United-States      | Longitudinal                                  | 838             | 52.4   | Shooting or hitting with weapon (gun or club); Last follow-up                                                                      | Cannabis use (increasing users, moderate users, quitters); Trajectories of 5 years                      | Gender, ethnicity, delinquency at T1, alcohol use at T1, peer deviance at T4, and educational level at T4 | High                                          |
| Dukarm et al., <sup>42</sup> 1996         | United-States      | Cross-sectional                               | 12,272          | 48     | Physical fighting; Past 12 months                                                                                                  | Cannabis use; Past month                                                                                |                                                                                                           | Moderate                                      |
| Epstein-Ngo et al., <sup>43</sup> 2013    | United-States      | Cross-sectional                               | 243             | 0      | Physical dating violence aggression; Past month                                                                                    | Cannabis use; Past month                                                                                | Age and race                                                                                              | Moderate                                      |
| Forman-Hoffman et al., <sup>50</sup> 2017 | United-States      | Cross-sectional                               | 2910            | 51.2   | Serious fights; Past 12 months                                                                                                     | Cannabis use; Past year initiates, Lifetime DSM-IV Cannabis use disorder; Past year initiates, Lifetime | Survey year                                                                                               | High                                          |

| Author, Year                          | Geographic setting | Study design based on the measures considered | Population      |        | Measures: Violence                                                                                                                                                                                                            | Measure: Cannabis        | Confounding factors                                                                                                          | Quality of observational study (GRADE System) |
|---------------------------------------|--------------------|-----------------------------------------------|-----------------|--------|-------------------------------------------------------------------------------------------------------------------------------------------------------------------------------------------------------------------------------|--------------------------|------------------------------------------------------------------------------------------------------------------------------|-----------------------------------------------|
|                                       |                    |                                               | Sample analyzed | % Boys |                                                                                                                                                                                                                               |                          |                                                                                                                              |                                               |
| Foshee et al., <sup>59</sup> 2010     | United-States      | Cross-sectional                               | 1666            | 51.1   | Dating violence perpetration (i.e., hitting, pushing, shoving, kicking, or assaulting partner with a weapon); Initiation of violence between fall and following spring                                                        | Cannabis use; Lifetime   | Family structure, parent education and number of friends who completed the survey                                            | High                                          |
| Grest et al., <sup>58</sup> 2018      | United-States      | Longitudinal                                  | 823             | 42     | Intimate partner violence, specifically sexual aggression perpetration; Past year                                                                                                                                             | Cannabis use; Lifetime   | History of any childhood abuse (i.e., psychological, physical, and sexual) and witnessing domestic violence during childhood | High                                          |
| Grunbaum et al., <sup>54</sup> 1998   | United-States      | Cross-sectional                               | 1617            | /      | Fought, Past 12 month                                                                                                                                                                                                         | Cannabis use; Past month | Age                                                                                                                          | High                                          |
| Herrenkohl et al., <sup>52</sup> 2012 | United-States      | Longitudinal                                  | 685             | 51     | Incidents of fighting (hitting someone with the intent to hurt that person; hitting a parent, using force against others, and hitting a teacher, beating someone badly and threatening someone with a weapon); Past 12 months | Cannabis use; Lifetime   | Gender and race                                                                                                              | High                                          |

| Author, Year                       | Geographic setting             | Study design based on the measures considered | Population      |        | Measures: Violence                                                                                       | Measure: Cannabis                                        | Confounding factors                                                                                                                                                                                                                                                                                                                                                                                                                                                       | Quality of observational study (GRADE System) |
|------------------------------------|--------------------------------|-----------------------------------------------|-----------------|--------|----------------------------------------------------------------------------------------------------------|----------------------------------------------------------|---------------------------------------------------------------------------------------------------------------------------------------------------------------------------------------------------------------------------------------------------------------------------------------------------------------------------------------------------------------------------------------------------------------------------------------------------------------------------|-----------------------------------------------|
|                                    |                                |                                               | Sample analyzed | % Boys |                                                                                                          |                                                          |                                                                                                                                                                                                                                                                                                                                                                                                                                                                           |                                               |
| Hughes et al., <sup>48</sup> 2008  | United-Kingdom, Germany, Spain | Cross-sectional                               | 3003            | 51.9   | Physical fights; During holidays                                                                         | Cannabis use; During holidays                            | Nationality, location of survey, gender, age group, length of stay, use of tobacco on holiday, use of cannabis on holiday, use of ecstasy on holiday, use of amphetamine on holiday, use of cocaine on holiday, use of GHB on holiday, use of ketamine on holiday, frequency of drunkenness on holiday, frequency of visiting bars or nightclubs on holiday, and reasons for visiting Ibiza/Majorca (cost, nightlife, culture, weather, work, visiting family or friends) | High                                          |
| Liakoni et al., <sup>21</sup> 2018 | Switzerland                    | Cross-sectional                               | 103             | 79     | Domestic violence (physical pain or damage intent inflicted); At presentation in an emergency department | Cannabis use, At presentation in an emergency department |                                                                                                                                                                                                                                                                                                                                                                                                                                                                           | Moderate                                      |
| Lowry et al., <sup>49</sup> 1999   | United-States                  | Cross-sectional                               | 10,904          | 52.1   | Physical fighting; Past 12 months                                                                        | Cannabis use; Past month                                 | Demographics                                                                                                                                                                                                                                                                                                                                                                                                                                                              | High                                          |

| Author, Year                                | Geographic setting | Study design based on the measures considered | Population      |        | Measures: Violence                                                                                                                                      | Measure: Cannabis            | Confounding factors                                                                                                                                                                   | Quality of observational study (GRADE System) |
|---------------------------------------------|--------------------|-----------------------------------------------|-----------------|--------|---------------------------------------------------------------------------------------------------------------------------------------------------------|------------------------------|---------------------------------------------------------------------------------------------------------------------------------------------------------------------------------------|-----------------------------------------------|
|                                             |                    |                                               | Sample analyzed | % Boys |                                                                                                                                                         |                              |                                                                                                                                                                                       |                                               |
| Lukash et al., <sup>51</sup> 2018           | Switzerland        | Cross-sectional                               | 3899            | 48.7   | Robbery and/or assault; Past 12 months                                                                                                                  | Cannabis use, Past month     | Gender and immigration background                                                                                                                                                     | Moderate                                      |
| Malik et al., <sup>31</sup> 1997            | United-States      | Cross-sectional                               | 707             | /      | Community violence (threw objects, pushed, grabbed or shoved, slapped, kicked, bit, or punched, and hit or tried to hit with an object); past 12 months | Cannabis use; Past 12 months | Sociodemographic variables, measures of exposure, measures of potential mediators                                                                                                     | High                                          |
| McNaughton Reyes et al., <sup>60</sup> 2014 | United-States      | Longitudinal                                  | 2455            | 47     | Physical dating violence (Use of physical force with the potential for causing harm against a dating partner); Past 3 months                            | Cannabis use; Past 3 months  | Grade-level, sex, race and parent education                                                                                                                                           | High                                          |
| Mercado-Crespo et al., <sup>23</sup> 2013   | United-States      | Cross-sectional                               | 12,404          | 49     | Involved physical fighting; 12 months                                                                                                                   | Cannabis use; Past month     | Age, sex and race/ethnicity                                                                                                                                                           | High                                          |
| Nabors et al., <sup>55</sup> 2010           | United-States      | Cross-sectional                               | 1635            | 39     | Intimate partner violence; Past 12 months                                                                                                               | Cannabis use, Past 12 months | Gender, racial and ethnic group, university year, parents' level of education, yearly family income, relationship status, alcohol consumption, and exposure to interparental violence | High                                          |

| Author, Year                            | Geographic setting | Study design based on the measures considered | Population      |          | Measures: Violence                                                                                                                                                  | Measure: Cannabis                                                         | Confounding factors                                                                                                                                                    | Quality of observational study (GRADE System) |
|-----------------------------------------|--------------------|-----------------------------------------------|-----------------|----------|---------------------------------------------------------------------------------------------------------------------------------------------------------------------|---------------------------------------------------------------------------|------------------------------------------------------------------------------------------------------------------------------------------------------------------------|-----------------------------------------------|
|                                         |                    |                                               | Sample analyzed | % Boys   |                                                                                                                                                                     |                                                                           |                                                                                                                                                                        |                                               |
| Reingle et al., <sup>27</sup> 2012      | United-States      | Longitudinal                                  | 9421            | 42.5     | Intimate partner violence (Threaten with violence, push or shove, throw something that could hurt, slap, kick, hit, give injuries because of fight); Past 12 months | Cannabis use (Consistent users, desisted users, initiated users); 6 years | Adjusted for race/ethnicity, gender, age, and listed covariate (Depression, parental involvement, binge drinking, peer cannabis and alcohol use, parental alcohol use) | High                                          |
| Salas-Wright et al., <sup>44</sup> 2016 | United-States      | Cross-sectional                               | 216,852         | 54.1     | Attacks intended to seriously harm; Past 12 months                                                                                                                  | Cannabis use; Past 12 months                                              |                                                                                                                                                                        | High                                          |
| Schepis et al., <sup>53</sup> 2012      | United-States      | Cross-sectional                               | 1906<br>2191    | 100<br>0 | Physical fighting; 12 months                                                                                                                                        | Cannabis use; Past month                                                  | Grade                                                                                                                                                                  | High                                          |
| Sholes-Balog et al., <sup>47</sup> 2016 | Australia          | Longitudinal                                  | 852             | 47       | Physical fights with people; Past 12 months                                                                                                                         | Cannabis use; 7 years                                                     |                                                                                                                                                                        | High                                          |
| Shorey et al., <sup>61</sup> 2014       | United-States      | Cross-sectional                               | 173             | 0        | Physical dating violence; Past 3 months                                                                                                                             | Cannabis use; Past 3 months                                               | Alcohol use                                                                                                                                                            | Moderate                                      |
| Shorey et al., <sup>45</sup> 2014       | United-States      | Cross-sectional                               | 67              | 100      | Physical dating violence; Past 3 months                                                                                                                             | Cannabis use; Past 3 months                                               | Alcohol use                                                                                                                                                            | Moderate                                      |
| Stoddard et al., <sup>30</sup> 2015     | United-States      | Cross-sectional                               | 599             | 59       | Peer violence (Physical assault and injury, pushed or hit, used a knife or gun); Past month                                                                         | Cannabis use; Past month                                                  | Age of aggression                                                                                                                                                      | Moderate                                      |

| Author, Year                           | Geographic setting | Study design based on the measures considered | Population      |        | Measures: Violence                                                                                                                        | Measure: Cannabis                             | Confounding factors                                                                                                    | Quality of observational study (GRADE System) |
|----------------------------------------|--------------------|-----------------------------------------------|-----------------|--------|-------------------------------------------------------------------------------------------------------------------------------------------|-----------------------------------------------|------------------------------------------------------------------------------------------------------------------------|-----------------------------------------------|
|                                        |                    |                                               | Sample analyzed | % Boys |                                                                                                                                           |                                               |                                                                                                                        |                                               |
| Temple et al., <sup>20</sup> 2013      | United-States      | Longitudinal                                  | 828             | 44     | Dating violence (Slapped, pushed, hit, threw something); Past 12 months                                                                   | Cannabis use; Lifetime                        | Grade level, sex, race/ethnicity, use of alcohol, cocaine, inhalants, ecstasy, or amphetamines, interparental violence | High                                          |
| Tinklenberg et al., <sup>46</sup> 1981 | United-States      | Cross-sectional                               | 293             | 100    | Homicide, inflicted wound, assault with weapon, robbery, man slaughter, sexual aggression; Lifetime                                       | Cannabis use; Lifetime                        |                                                                                                                        | Moderate                                      |
| Tucker et al., <sup>57</sup> 2005      | United-States      | Longitudinal                                  | 5833            | 57     | Predatory violence (e.g., gang fighting, attacking someone); Past 12 months                                                               | Cannabis use (persistent use); Past 12 months |                                                                                                                        | High                                          |
| Walton et al., <sup>62</sup> 2009      | United-States      | Cross-sectional                               | 1128            | 45.9   | Physical peer violence (i.e., pushed slapped, fights, beat up, used a knife/gun); Past 12 months                                          | Cannabis use; Past 12 months                  |                                                                                                                        | Moderate                                      |
| Wei et al., <sup>56</sup> 2004         | United-States      | Longitudinal                                  | 417             | 100    | Gang fighting, strong-arming, attacking someone with a weapon or intent to seriously hurt or kill, and rape or forced sex; Past 12 months | Cannabis use (persistent use); 9 years        | Prior year violence and alcohol                                                                                        | High                                          |



**Table S1. MOOSE Checklist.**

| Item No                                     | Recommendation                                                                                                                                                                                                                                                               | Reported on Page No |
|---------------------------------------------|------------------------------------------------------------------------------------------------------------------------------------------------------------------------------------------------------------------------------------------------------------------------------|---------------------|
| Reporting of background should include      |                                                                                                                                                                                                                                                                              |                     |
| 1                                           | Problem definition                                                                                                                                                                                                                                                           | 1                   |
| 2                                           | Hypothesis statement                                                                                                                                                                                                                                                         | 2                   |
| 3                                           | Description of study outcome(s)                                                                                                                                                                                                                                              | 2                   |
| 4                                           | Type of exposure or intervention used                                                                                                                                                                                                                                        | 2                   |
| 5                                           | Type of study designs used                                                                                                                                                                                                                                                   | 2                   |
| 6                                           | Study population                                                                                                                                                                                                                                                             | 2                   |
| Reporting of search strategy should include |                                                                                                                                                                                                                                                                              |                     |
| 7                                           | Qualifications of searchers (eg, librarians and investigators)                                                                                                                                                                                                               | 2                   |
| 8                                           | Search strategy, including time period included in the synthesis and key words                                                                                                                                                                                               | 2                   |
| 9                                           | Effort to include all available studies, including contact with authors                                                                                                                                                                                                      | 2                   |
| 10                                          | Databases and registries searched                                                                                                                                                                                                                                            | 2                   |
| 11                                          | Search software used, name and version, including special features used (eg, explosion)                                                                                                                                                                                      | 2                   |
| 12                                          | Use of hand searching (eg, reference lists of obtained articles)                                                                                                                                                                                                             | 2                   |
| 13                                          | List of citations located and those excluded, including justification                                                                                                                                                                                                        | 2                   |
| 14                                          | Method of addressing articles published in languages other than English                                                                                                                                                                                                      | 2                   |
| 15                                          | Method of handling abstracts and unpublished studies                                                                                                                                                                                                                         | 2                   |
| 16                                          | Description of any contact with authors                                                                                                                                                                                                                                      | 2                   |
| Reporting of methods should include         |                                                                                                                                                                                                                                                                              |                     |
| 17                                          | Description of relevance or appropriateness of studies assembled for assessing the hypothesis to be tested                                                                                                                                                                   | 2                   |
| 18                                          | Rationale for the selection and coding of data (eg, sound clinical principles or convenience)                                                                                                                                                                                | 2                   |
| 19                                          | Documentation of how data were classified and coded (eg, multiple raters, blinding and interrater reliability)                                                                                                                                                               | 2                   |
| 20                                          | Assessment of confounding (eg, comparability of cases and controls in studies where appropriate)                                                                                                                                                                             | 2                   |
| 21                                          | Assessment of study quality, including blinding of quality assessors, stratification or regression on possible predictors of study results                                                                                                                                   | 2                   |
| 22                                          | Assessment of heterogeneity                                                                                                                                                                                                                                                  | 3                   |
| 23                                          | Description of statistical methods (eg, complete description of fixed or random effects models, justification of whether the chosen models account for predictors of study results, dose-response models, or cumulative meta-analysis) in sufficient detail to be replicated | 2-3                 |
| 24                                          | Provision of appropriate tables and graphics                                                                                                                                                                                                                                 | Suppl. Mat.         |
| Reporting of results should include         |                                                                                                                                                                                                                                                                              |                     |
| 25                                          | Graphic summarizing individual study estimates and overall estimate                                                                                                                                                                                                          | 4                   |

| <b>Item No</b>                          | <b>Recommendation</b>                                                                                                     | <b>Reported on Page No</b> |
|-----------------------------------------|---------------------------------------------------------------------------------------------------------------------------|----------------------------|
| 26                                      | Table giving descriptive information for each study included                                                              | Suppl. Mat                 |
| 27                                      | Results of sensitivity testing (eg, subgroup analysis)                                                                    | 3                          |
| 28                                      | Indication of statistical uncertainty of findings                                                                         | 3                          |
| Reporting of discussion should include  |                                                                                                                           |                            |
| 29                                      | Quantitative assessment of bias (eg, publication bias)                                                                    | 3                          |
| 30                                      | Justification for exclusion (eg, exclusion of non-English language citations)                                             | 3                          |
| 31                                      | Assessment of quality of included studies                                                                                 | Suppl. Mat                 |
| Reporting of conclusions should include |                                                                                                                           |                            |
| 32                                      | Consideration of alternative explanations for observed results                                                            | 4-6                        |
| 33                                      | Generalization of the conclusions (ie, appropriate for the data presented and within the domain of the literature review) | 6                          |
| 34                                      | Guidelines for future research                                                                                            | 6                          |
| 35                                      | Disclosure of funding source                                                                                              | 6                          |

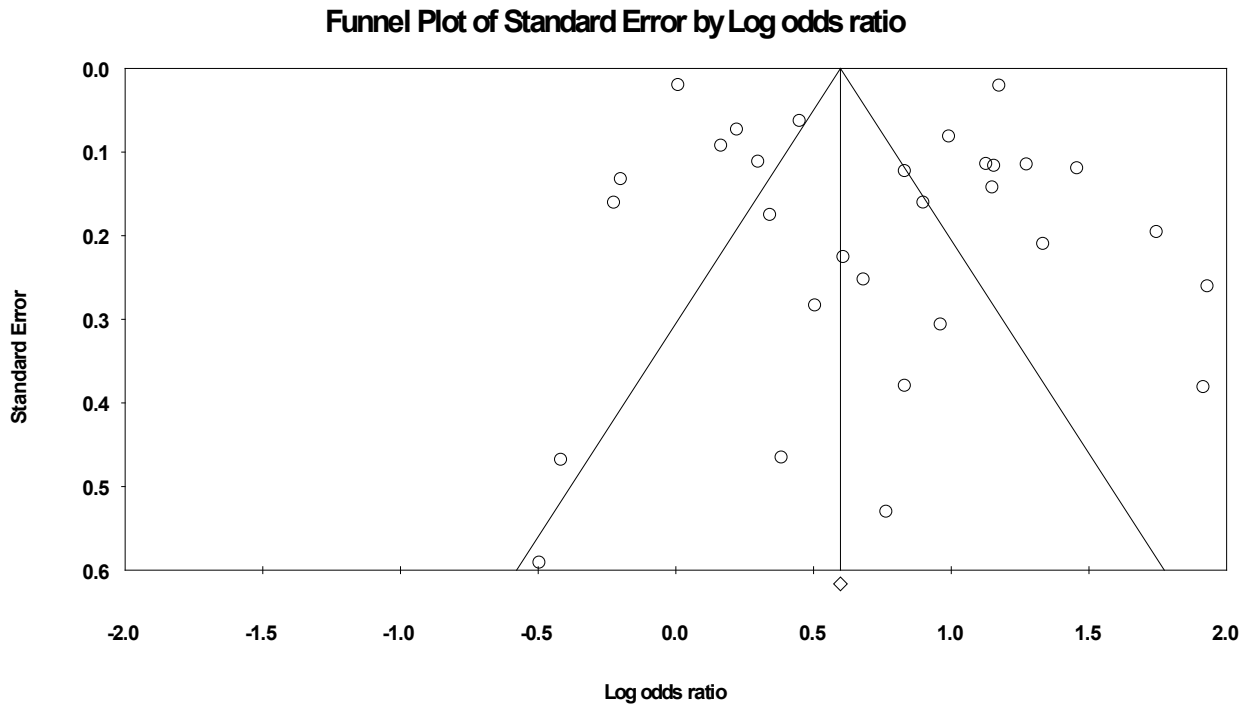

**Figure S1. Egger's test for publication bias.**
